# Supplementary material
Source: PubMed Central journal article supplement (PMC2612562)
Supplement: NIHMS71378-supplement-supp_data.pdf [file NIHMS71378-supplement-supp_data.pdf]

**Table S1. NQO1, NQO2, P450R, and b5R activity in all transfected MDA468 clones.**

| Clones                      |        | Enzyme Activity   |                    |                  |                   |
|-----------------------------|--------|-------------------|--------------------|------------------|-------------------|
| Description                 | Name   | NQO1 <sup>a</sup> | P450R <sup>b</sup> | b5R <sup>c</sup> | NQO2 <sup>d</sup> |
| Parental                    | MDA468 | ND <sup>e</sup>   | 3.0 ± 0.9          | 270.8 ± 32.2     | 2.3 ± 0.3         |
| NQO1<br>Knock-in            | NQ16   | 1061.4 ± 50.5     | 3.0 ± 0.2          | 271.8 ± 30.8     | 2.0 ± 0.4         |
|                             | R3     | ND                | 8.3 ± 0.4          | 324.0 ± 19.0     | 1.5 ± 0.4         |
| P450R<br>Knock-in<br>clones | R5     | ND                | 89.3 ± 2.7         | 338.6 ± 31.0     | 2.5 ± 0.4         |
|                             | R7     | ND                | 16.8 ± 4.3         | 310.6 ± 21.2     | 2.9 ± 1.7         |
|                             | R10    | ND                | 77.9 ± 1.2         | 345.0 ± 9.3      | 2.7 ± 0.4         |
|                             | R12    | ND                | 17.8 ± 2.9         | 328.5 ± 42.0     | 2.2 ± 0.6         |
| b5R<br>Knock-in<br>clones   | C      | ND                | 5.1 ± 0.1          | 1216.4 ± 49.1    | 2.7 ± 0.1         |
|                             | D      | ND                | 4.2 ± 0.6          | 1637.1 ± 143.4   | 4.0 ± 0.6         |
|                             | H      | ND                | 5.0 ± 0.4          | 889.9 ± 39.3     | 2.4 ± 0.4         |
| NQO2<br>Knock-in<br>clones  | NQ2C2  | ND                | 3.3 ± 1.1          | 281.9 ± 63.3     | 77.0 ± 7.0        |
|                             | NQ2C3  | ND                | 3.3 ± 1.4          | 268.5 ± 28.6     | 28.8 ± 2.6        |
|                             | NQ2C4  | ND                | 3.2 ± 0.1          | 268.3 ± 48.1     | 73.3 ± 6.8        |
|                             | NQ2C5  | ND                | 2.3 ± 1.3          | 286.3 ± 78.2     | 38.2 ± 1.1        |

<sup>a</sup>NQO1 activity was expressed as nmole DCPIP reduced/min/mg protein; <sup>b</sup>P450R activity was expressed as nmole cytochrome *c* reduced/min/mg protein; <sup>c</sup>b5R activity was expressed as nmole potassium ferricyanide reduced/min/mg protein; <sup>d</sup>NQO2 activity was expressed as nmole MTT formazan/min/mg protein; <sup>e</sup>ND, non-detectable, < 5 nmole DCPIP/min/mg protein.

**Table S2. Percent of DNA in comet tail for all the transfected clones following RH1 treatment.**

| MDA468 Clones        |        | Modified Comet Assay (Cross-linking) |                                            |      |      |      | Alkaline Comet Assay (Single Strand Breaks) |                        |                 |     |     |
|----------------------|--------|--------------------------------------|--------------------------------------------|------|------|------|---------------------------------------------|------------------------|-----------------|-----|-----|
| Description          | Name   | Control                              | H <sub>2</sub> O <sub>2</sub> <sup>a</sup> |      |      |      | Control                                     | Menadione <sup>b</sup> | RH1 (nM)        |     |     |
|                      |        |                                      | 0                                          | 50   | 100  | 500  |                                             |                        | 50              | 100 | 500 |
| Parental             | MDA468 | 9.1                                  | 71.4                                       | 72.7 | 68.3 | 54.2 | 7.2                                         | 60.6                   | 8.1             | 8.4 | 7.6 |
| NQO1-KI <sup>c</sup> | NQ16   | 6.4                                  | 71.1                                       | 36.5 | 22.1 | 6.9  |                                             |                        | ND <sup>d</sup> |     |     |
| P450R-KI             | R12    | 6.6                                  | 72.8                                       | 71.0 | 65.7 | 55.7 | 6.1                                         | 71.2                   | 6.5             | 6.2 | 8.3 |
|                      | R10    | 6.8                                  | 73.9                                       | 68.0 | 59.0 | 35.2 | 7.6                                         | 75.0                   | 7.2             | 7.8 | 6.4 |
|                      | R5     | 5.4                                  | 68.8                                       | 54.4 | 61.4 | 26.7 | 6.9                                         | 82.7                   | 6.8             | 7.3 | 7.4 |
| b5R-KI               | D      | 8.2                                  | 72.1                                       | 64.5 | 59.1 | 46.3 | 8.1                                         | 72.2                   | 8.6             | 9.6 | 8.3 |
| NQO2-KI              | NQ2C3  | 10.0                                 | 70.4                                       | 62.5 | 54.7 | 36.6 |                                             |                        | ND <sup>d</sup> |     |     |
|                      | NQ2C4  | 9.7                                  | 72.3                                       | 55.7 | 43.0 | 28.2 |                                             |                        | ND <sup>d</sup> |     |     |

<sup>a</sup>Samples were treated with 200  $\mu$ M of H<sub>2</sub>O<sub>2</sub> for 20 min on ice post-RH1 treatment; <sup>b</sup>2  $\mu$ M menadione was used as positive control for DNA single strand breaks; <sup>c</sup>KI, knock in; <sup>d</sup>ND, not determined. Percent of DNA in comet tail was recorded by the Komet software; values listed in the table represent the mean value of three independent determinations.

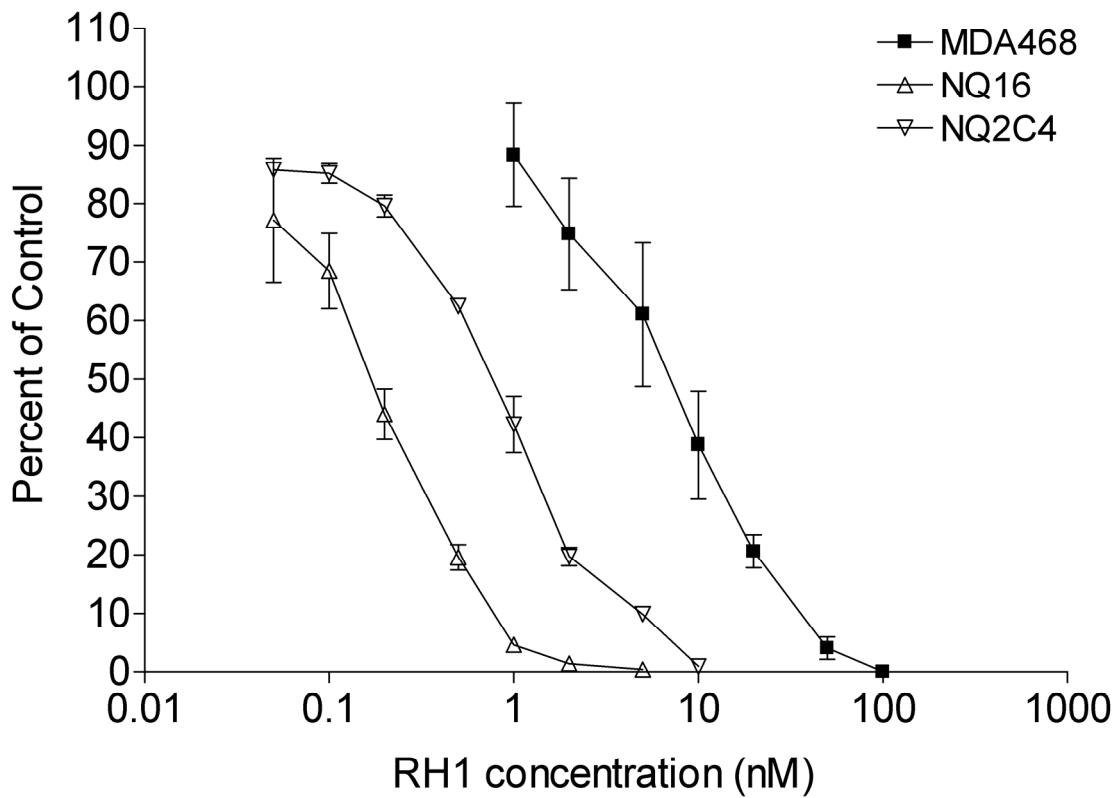

**Figure S1. Effect of RH1 on colony formation in MDA468 and NQO1/NQO2 transfected clones.** Colony forming ability of the parental MDA468, the NQO1 knock-in clone NQ16, and the NQO2 knock-in clone NQ2C4, was measured using the clonogenics assay following RH1 treatment. Data represents mean  $\pm$  standard deviation, n = 3.

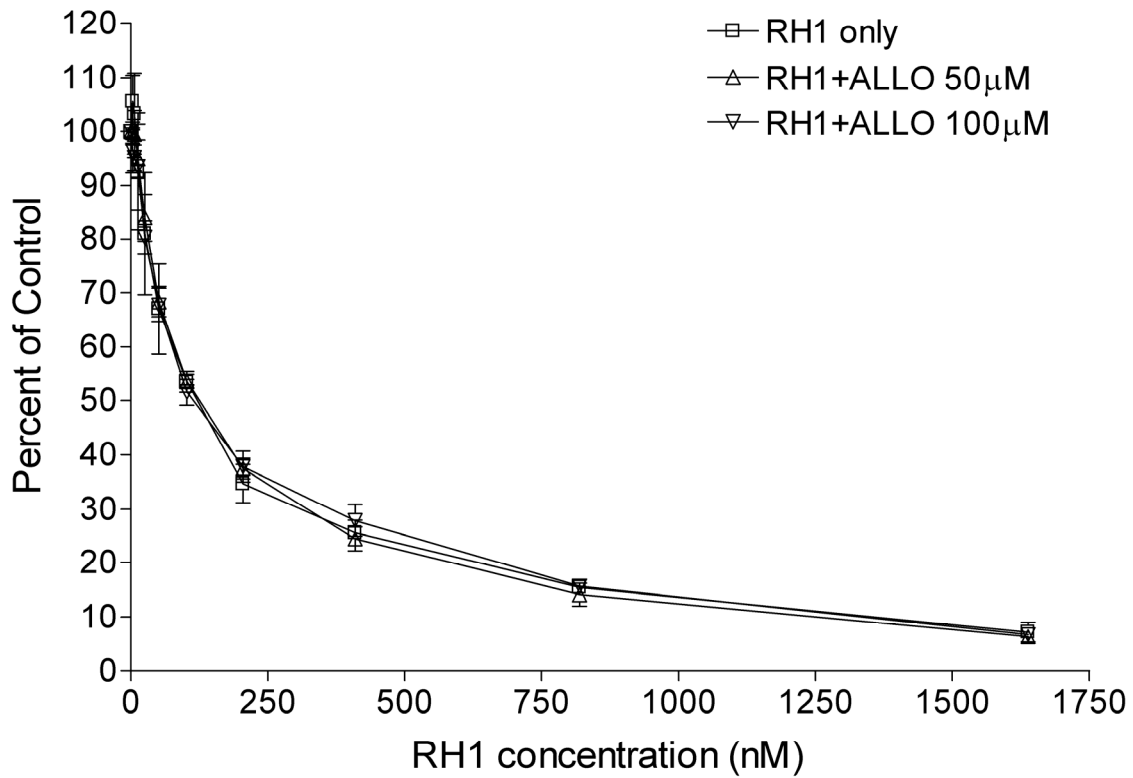

**Figure S2. Effect of allopurinol pretreatment on RH1 cytotoxicity in MDA468 cells.** Cells were seeded in 96-well plates and pretreated with 50 or 100 µM allopurinol for 30 min before 2 h of RH1 treatment. Growth inhibition was measured 3 d after incubation in complete medium using the MTT method. Data represents the mean  $\pm$  standard deviation of three independent determinations.
